# Supplementary material for: Multiple co-clustering based on nonparametric mixture models with heterogeneous marginal distributions
Source: PubMed Central journal article supplement (PMC5648298; doi:10.1371/journal.pone.0186566), 2017-10-19
Supplement: pone.0186566.s001.pdf [file pone.0186566.s001.pdf]

## S1 Appendix:

### Observation models for Gaussian, Poisson and multinomial

This is a supplementary material for observation models in the main manuscript, providing priors, the expectation of log-likelihood and the updating equations.

#### Gaussian distribution

We denote univariate Gaussian density function as  $\text{Gauss}(\cdot|\mu, \sigma^2)$  where  $\mu$  and  $\sigma^2$  are mean and variances. We assume conjugate priors for  $\mu$  and  $\sigma^2$  in each cluster block:

$$\begin{aligned} s_{v,g,k} &\sim \text{Ga}(\cdot|\gamma_0/2, \gamma_0\sigma_0^2/2) \\ \mu_{v,g,k} &\sim \text{Gauss}(\cdot|\mu_0, (\lambda_0 s_{v,g,k})^{-1}), \end{aligned}$$

where  $\text{Ga}(\cdot|a, b)$  denotes Gamma distribution with shape and rate parameters  $(a, b)$ . In the present paper, we set  $\sigma_0^2 = 10^4$ ,  $\gamma_0 = 1$ , and  $\lambda_0 = 10^{-4}$  so that the prior distributions are nearly non-informative. It can be shown that the variational approximation for the posterior  $q_{\theta^{(m)}}(\theta^{(m)})$  is given by

$$\begin{aligned} &\prod_{v=1}^V \prod_{g=1}^G \prod_{k=1}^K \text{Gauss}(\mu_{v,g,k}|\mu_{0,v,g,k}, (\lambda_{0,v,g,k} s_{0,v,g,k})^{-1}) \\ &\quad \times \text{Ga}(s_{0,v,g,k}|\gamma_{0,v,g,k}/2, \gamma_{0,v,g,k}\sigma_{0,v,g,k}^2/2), \end{aligned}$$

where the hyperparameters are updated by

$$\begin{aligned}
\lambda_{0,v,g,k} &= \lambda_0 + \sum_{j=1}^{d^{(m)}} \sum_{i=1}^n \tau_{j,v,g}^{(m)} \eta_{i,v,k} \\
\mu_{0,v,g,k} &= \frac{1}{\lambda_{0,v,g,k}} \left\{ \lambda_0 \mu_0 + \sum_{j=1}^{d^{(m)}} \sum_{i=1}^n \tau_{j,v,g}^{(m)} \eta_{i,v,k} X_{i,j}^{(m)} \right\} \\
\gamma_{0,v,g,k} &= \gamma_0 + \sum_{j=1}^{d^{(m)}} \sum_{i=1}^n \tau_{j,v,g}^{(m)} \eta_{i,v,k} \\
\sigma_{0,v,g,k}^2 &= \frac{1}{\gamma_{0,v,g,k}} \left\{ \gamma_0 \sigma_0^2 + \lambda_0 \mu_0^2 \right. \\
&\quad \left. + \sum_{j=1}^{d^{(m)}} \sum_{i=1}^n \tau_{j,v,g}^{(m)} \eta_{i,v,k} (X_{i,j}^{(m)})^2 - \lambda_{0,v,g,k} \mu_{0,v,g,k}^2 \right\}.
\end{aligned}$$

Finally, the expectation of the conditional log-likelihood  $\mathbb{E}_{q(\boldsymbol{\theta})} \left[ \log p(X_{i,j}^{(m)} | \boldsymbol{\theta}_{v,g,k}^{(m)}) \right]$  is given by

$$\begin{aligned}
&-\frac{1}{2} \left\{ \frac{(X_{i,j}^{(m)} - \mu_{0,v,g,k})^2}{\sigma_{0,v,g,k}^2} + \frac{1}{\lambda_{0,v,g,k}} + \log \sigma_{0,v,g,k}^2 \right. \\
&\quad \left. + \log(\gamma_{0,v,g,k}/2) - \psi(\gamma_{0,v,g,k}/2) + \log(2\pi) \right\}.
\end{aligned}$$

## Poisson distribution

We denote Poisson distribution as  $\text{Poisson}(\cdot | \lambda)$  where  $\lambda$  is a rate parameter. The conjugate prior for  $\lambda$  is given by

$$\lambda_{v,g,k} \sim \text{Ga}(\cdot | \alpha_0, \beta_0),$$

where we set  $\alpha_0$  and  $\beta_0$  to one. It can be shown that the variational approximation is given by

$$q_{\boldsymbol{\theta}^{(m)}}(\boldsymbol{\theta}^{(m)}) = \prod_{v=1}^V \prod_{g=1}^G \prod_{k=1}^K \text{Ga}(\lambda_{v,g,k} | \alpha_{0,v,g,k}, \beta_{0,v,g,k}),$$

where the hyperparameters are updated by

$$\begin{aligned}\alpha_{0,v,g,k} &= \alpha_0 + \sum_{j=1}^{d^{(m)}} \sum_{i=1}^n \tau_{j,v,g}^{(m)} \eta_{i,v,k} X_{i,j}^{(m)} \\ \beta_{0,v,g,k} &= \beta_0 + \sum_{j=1}^{d^{(m)}} \sum_{i=1}^n \tau_{j,v,g}^{(m)} \eta_{i,v,k}.\end{aligned}$$

The expectation of the conditional log-likelihood becomes

$$\begin{aligned}X_{i,j}^{(m)} \{ \psi(\alpha_{0,v,g,k}) - \psi(\beta_{0,v,g,k}) \} \\ - \frac{\alpha_{0,v,g,k}}{\beta_{0,v,g,k}} - \sum_{t=1}^{X_{i,j}^{(m)}} \log t.\end{aligned}$$

## Categorical/multinomial distribution

For a categorical feature  $x$  ( $x \in \{c_1, \dots, c_H\}$ ), we denote categorical distribution as  $\text{Cat}(\cdot | \mathbf{p})$  where  $H$  is the number of categories, and  $\mathbf{p} = (p_1, \dots, p_H)$  are probabilities for each category with  $\sum_{h=1}^H p_h = 1$ . We assume the conjugate prior for  $(p_1, \dots, p_H)$ ,

$$(p_1, \dots, p_H) \sim \text{Dirichlet}(\cdot | \boldsymbol{\rho}_0),$$

where  $\text{Dirichlet}(\cdot | \boldsymbol{\rho}_0)$  denotes a Dirichlet distribution with prior sample size  $\boldsymbol{\rho}_0$ . We set  $\boldsymbol{\rho}_0$  to  $(1, \dots, 1)$ . It can be shown that

$$q_{\boldsymbol{\theta}^{(m)}}(\boldsymbol{\theta}^{(m)}) = \prod_{v=1}^V \prod_{g=1}^G \prod_{k=1}^K \text{Dirichlet}(\mathbf{p}_{v,g,k} | \boldsymbol{\rho}_{0,v,g,k}),$$

where the hyperparameters are updated by

$$\rho_{0,v,g,k,h} = \rho_{0,h} + \sum_{j=1}^{d^{(m)}} \sum_{i=1}^n \tau_{j,v,g}^{(m)} \eta_{i,v,k} \mathbb{I}(X_{i,j}^{(m)} = c_h),$$

where  $\rho_{0,v,g,k,h}$  denotes the  $h$ th element of  $\boldsymbol{\rho}_{0,v,g,k}$ . The expectation of the log-likelihood is then given by

$$\sum_{h=1}^H \mathbb{I}(X_{i,j}^{(m)} = c_h) \left\{ \psi(\rho_{0,h,v,g,k}) - \psi\left(\sum_{h'=1}^H \rho_{0,h',v,g,k}\right) \right\}.$$

Since the categorical distribution differs depending on the number of categories  $H$ , we need to define different types of categorical distribution. Alternatively, for the purpose of simplicity, we can set  $H$  to the maximum number of categories for different categorical features, and fit a single family of categorical distribution to all these features.

More generally, in the case of multinomial distribution, the update equation and the expectation of the log-likelihood becomes

$$\begin{aligned} \rho_{0,v,g,k,h} = \rho_{0,h} + \sum_{j=1}^{d^{(m)}} \sum_{i=1}^n \tau^{(m)} \eta_{i,v,k} n_{i,j,h} \\ \sum_{h=1}^H n_{i,j,h} \{ \psi(\rho_{0,h,v,g,k}) - \psi(\sum_{h'=1}^H \rho_{0,h',v,g,k}) \} \\ + \log \left( \binom{\sum_{h=1}^H n_{i,j,h}}{n_{i,j,1}, \dots, n_{i,j,H}} \right), \end{aligned}$$

where  $n_{i,j,h}$  is the number of category  $c_h$  in  $X_{i,j}^{(m)}$ ; the last term is the logarithm of multinomial coefficients.
